# Supplementary material for: A novel S-scheme heterojunction based on 0D/3D CeO2/Bi2O2CO3 for the photocatalytic degradation of organic pollutants
Source: Royal Society of Chemistry journal article supplement (doi:10.1039/d2nj03192b), 2022-01-01
Supplement: d2nj03192b1.pdf [file d2nj03192b1.pdf]

A novel S-scheme heterojunction based on 0D/3D  
CeO<sub>2</sub>/Bi<sub>2</sub>O<sub>2</sub>CO<sub>3</sub> for photocatalytic degradation of organic  
pollutants

Chuantao Wang, Yuechen Dang, Xiangxiang Pang, Le Zhang, Yujie Bian, Wen Duan,  
Chunming Yang\*, Yanzhong Zhen\*, Feng Fu\*

*College of Chemistry & Chemical Engineering, Yan'an University, Research Institute  
of Comprehensive Energy Industry Technology, Shaanxi Key Laboratory of Chemical  
Reaction Engineering, Yan'an 716000, P. R. China*

\*Corresponding authors: Chunming Yang, Yanzhong Zhen, Feng Fu

**E-mail:** chunmingyang@yau.edu.cn (C. Yang), zhenyanzhong@yau.edu.cn (Z. Zhen),  
yadxfufeng@126.com (F. Fu).

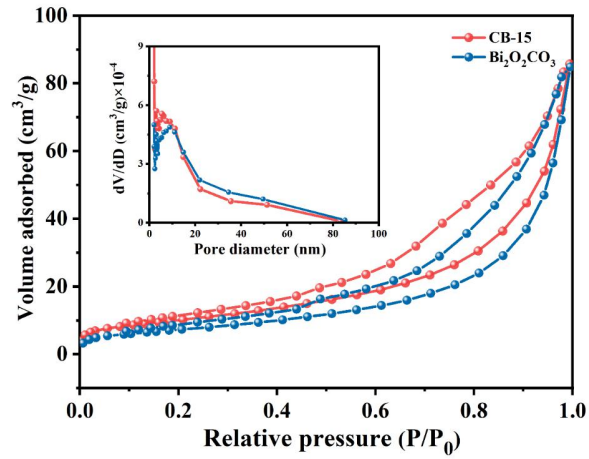

**Fig. S1.** N<sub>2</sub> adsorption/desorption isotherms and BJH pore diameter distribution of Bi<sub>2</sub>O<sub>2</sub>CO<sub>3</sub> and CB-15.

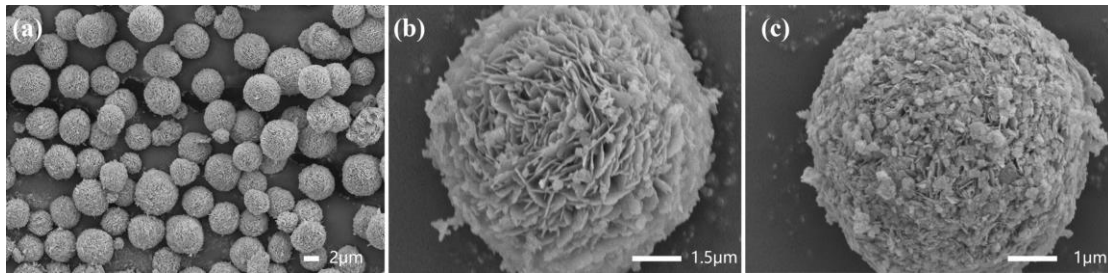

**Fig. S2.** SEM images of (a) Bi<sub>2</sub>O<sub>2</sub>CO<sub>3</sub>, (b) CB-10, and (c) CB-20.

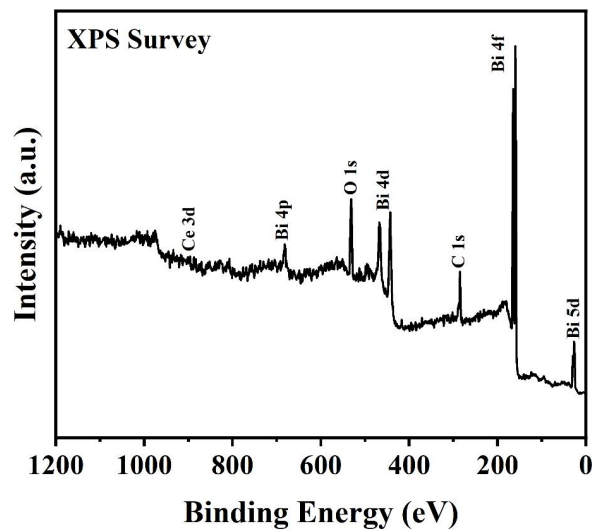

**Fig. S3.** XPS spectra of CB-15.

**Table S1.**  $E_{VB}$ ,  $E_{CB}$  and  $E_g$  of  $\text{Bi}_2\text{O}_2\text{CO}_3$  and  $\text{CeO}_2$ .

| Semiconductor                      | $E_{VB}$ (eV) | $E_{CB}$ (eV) | $E_g$ (eV) |
|------------------------------------|---------------|---------------|------------|
| $\text{Bi}_2\text{O}_2\text{CO}_3$ | -0.01         | 3.27          | 3.28       |
| $\text{CeO}_2$                     | -0.69         | 1.72          | 2.41       |

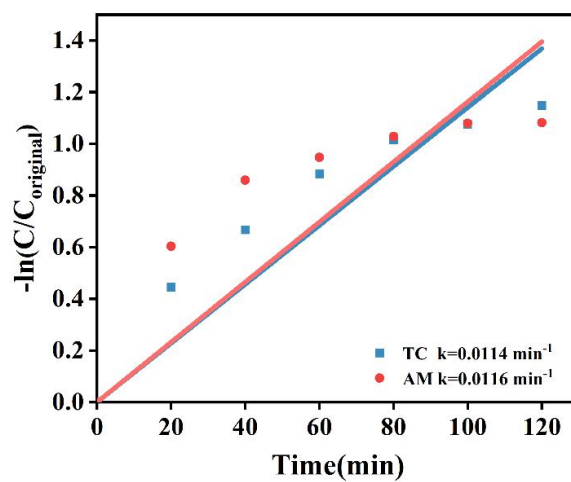

**Fig. S4.** Photodegradation kinetics curves of TC and AM.

**Table S2.** The comparison of photocatalytic performance of CB-15 and other photocatalysts for the degradation of MB and TC.

| Photocatalyst                                                                      | Dosage (mg) | Concentration of pollutant (mg L <sup>-1</sup> ) |    | Light source      | Volume (mL)         | Removal efficiency (%) | Rate constant (min <sup>-1</sup> ) | Time (min) | Ref.      |
|------------------------------------------------------------------------------------|-------------|--------------------------------------------------|----|-------------------|---------------------|------------------------|------------------------------------|------------|-----------|
|                                                                                    |             | MB                                               | TC |                   |                     |                        |                                    |            |           |
| Cu <sub>2</sub> ONPs/Bi <sub>2</sub> O <sub>2</sub> CO <sub>3</sub>                | 500         | 10                                               | /  | 250 W halide lamp | 100                 | 94                     | 0.0132                             | 20         | 1         |
| MgAl <sub>2</sub> O <sub>4</sub> /CeO <sub>2</sub> /Mn <sub>3</sub> O <sub>4</sub> | 100         | 5                                                | /  | 150 W Xe lamp     | 100                 | 94.6                   | 0.0160                             | 180        | 2         |
| Ag <sub>2</sub> CO <sub>3</sub> /Bi <sub>2</sub> O <sub>2</sub> CO <sub>3</sub>    | 100         | 10                                               | /  | 300 W Xe lamp     | 100                 | 96                     | 0.0233                             | 120        | 3         |
| CeO <sub>2</sub> /g-C <sub>3</sub> N <sub>4</sub>                                  | 50          | 10                                               | /  | 36 W UV lamp      | 100                 | 90.1                   | 0.0300                             | 180        | 4         |
| g-C <sub>3</sub> N <sub>4</sub> /Bi <sub>2</sub> O <sub>2</sub> CO <sub>3</sub>    | 50          | /                                                | 20 | 1000 W Xenon lamp | 100                 | ~94                    | 0.00737                            | 360        | 5         |
| In <sub>2</sub> S <sub>3</sub> /Bi <sub>2</sub> O <sub>2</sub> CO <sub>3</sub>     | 30          | /                                                | 10 | 400 W Xenon lamp  | 30                  | 70                     | 0.00537                            | 180        | 6         |
| β-Bi <sub>2</sub> O <sub>3</sub> @CeO <sub>2</sub>                                 | 50          | /                                                | 10 | 500 W Xenon lamp  | 100                 | ~92                    | 0.0110                             | 180        | 7         |
| BiOI/g-C <sub>3</sub> N <sub>4</sub> /CeO <sub>2</sub>                             | 50          | /                                                | 20 | 300 W Xenon lamp  | 30                  | 91.6                   | 0.0205                             | 120        | 8         |
| CeO <sub>2</sub> /Bi <sub>2</sub> O <sub>2</sub> CO <sub>3</sub>                   | 200         | /                                                | 20 | 500 W Xe lamp     | 100 (MB)<br>40 (TC) | 98 (MB)<br>79 (TC)     | 0.0256 (MB)<br>0.0114 (TC)         | 120        | This work |

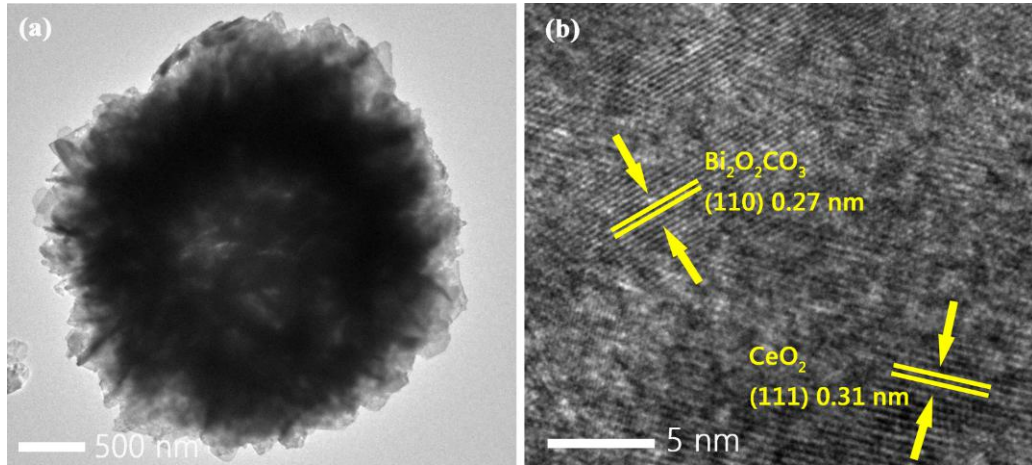

**Fig. S5.** (a) TEM and (b) HR-TEM images of CB-15 after photodegradation experiments.

## References:

1. S.-L. Lin, W.-Q. Cui, X.-G. Li, H. Sui and Z.-S. Zhang, *Catal. Today*, 2017, **297**, 237-245.
2. J. Li, S. Wang, G. Sun, H. Gao, X. Yu, S. Tang, X. Zhao, Z. Yi, Y. Wang and Y. Wei, *Mater. Today Chem.*, 2021, **19**, 100390.
3. T.-T. Li, X.-L. Hu, C.-C. Liu, C.-M. Tang, X.-K. Wang and S.-L. Luo, *J. Mol. Catal. A-Chem.*, 2016, **425**, 124-135.
4. Y.-F. Miao, R.-T. Guo, J.-W. Gu, Y.-Z. Liu, G.-L. Wu, C.-P. Duan and W.-G. Pan, *ACS Appl. Nano Mater.*, 2021, **4**, 4902-4911.
5. H.-P. Zhao, G.-F. Li, F. Tian, Q.-T. Jia, Y.-L. Liu and R. Chen, *Chem. Eng. J.*, 2019, **366**, 468-479.
6. H.-X. Fan, H.-L. Zhou, W.-J. Li, S.-N. Gu and G.-W. Zhou, *Appl. Sci.*, 2020, **504**, 144351.
7. X.-Y. Yang, Y.-M. Zhang, Y.-L. Wang, C.-L. Xin, P.-Z. Zhang, D. Liu, B.-B. Mamba, K.-K. Kefeni, A. T. Kuvarega and J.-Z. Gui, *Chem. Eng. J.*, 2020, **387**, 124100.
8. X.-D. Jiang, S.-F. Lai, W.-C. Xu, J.-Z. Fang, X. Chen, J.-Z. Beiyuan, X.-W. Zhou, K.-C. Lin, J.-X. Liu and G.-C. Guan, *J. Alloys Compd.*, 2019, **809**, 151804.
